# Supplementary material for: LPJ-GM 1.0: simulating migration efficiently in a dynamic vegetation model
Source: Copernicus journal article supplement (doi:10.5194/gmd-12-893-2019), 2019-03-08
Supplement: Supplementary file 2 [file Supp_2_Seed_dispersal_runtime_test.pdf › Supp_2_Seed_dispersal_runtime_test.pdf]

---

# Computation speed test for seed dispersal fft based versus explit simulation.

Supplement to Lehsten et al. : Simulating migration in dynamic vegetation models efficiently with LPJ-GM 1.0 .

```
% clear the memory  
clear  
%
```

**Generate a seed kernel**

```
x1 = -3:.2:3; x2 = -3:.2:3;  
[X1,X2] = meshgrid(x1,x2);  
%here we generate a seed kernel which has a higher extent in NW to SE  
direction  
  
F = mvnpdf([X1(:) X2(:)],[0 0],[.25 .3; .3 1]); % use a multivariate  
normal density distribution  
kernelorg = reshape(F,length(x2),length(x1)); % this is now our seed  
kernel with the size of 31 by 31 cells  
kernelorg = kernelorg/(sum(sum(kernelorg))); % norm to unity sum  
%plot the seed kernel  
figure;imagesc(kernelorg)  
title ('Seed kernel')
```

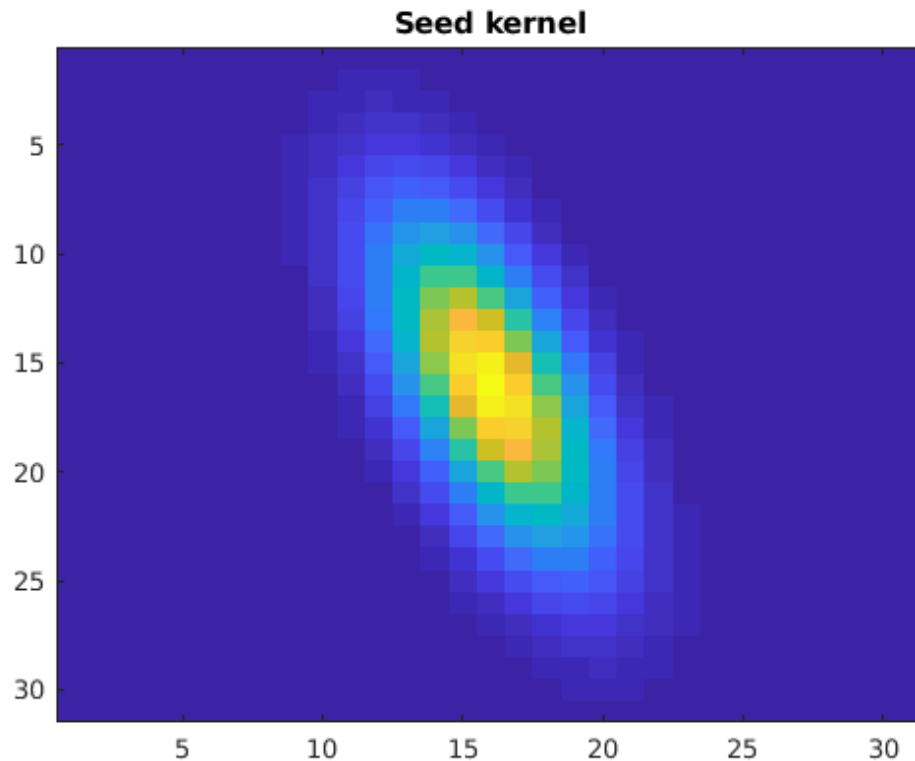

---

## S2.1 Seed kernel

```
%increase area size by looping
round=0;
for size_area=31:20:351 % area should always be odd and quadratic for
    simplicity decrease the last number if you want to test smaller areas

    round=round+1;
    seed_prod=rand(size_area); % assign random values to the seed
    production

    % add an empty border to avoid edge effects
    seed_prod_with_border=zeros(size_area*3); %

    seed_prod_with_border(size_area+1:2*size_area,size_area
+1:2*size_area)=seed_prod;

    %extend size and transform it by swapping columns and rows in a way
    that the
    %centercells are now in the corners of the kernel
    kernel_large=zeros(size_area*3);

    %place original kernel in the middle
    kernel_large((ceil(size_area*3/2)-ceil(size(kernelorg,1)/2)):
(floor(size_area*3/2)+floor(size(kernelorg,1)/2)),...
        (ceil(size_area*3/2)-ceil(size(kernelorg,2)/2)):
(floor(size_area*3/2)+floor(size(kernelorg,2)/2)))=...
        kernelorg;
```

**Here comes the transformation of the seed kernel, see Methods section**

```
kernel_large_transformed = kernel_large(mod((1:size_area*3)
- (size_area*3+3)/2, size_area*3) + 1, mod((1:size_area*3) -
(size_area*3+3)/2, size_area*3) + 1) ;
```

**Perform the fft based seed dispersal**

```
% start taking time
tic
```

**The fft based seed dispersal**

```
newseeds_fft_with_border=abs(ifft2(fft2(seed_prod_with_border).*...
    fft2(kernel_large_transformed)));

% extract the area without the borders
newseeds_fft=newseeds_fft_with_border(size_area
+1:2*size_area,size_area+1:2*size_area);

% end taking time
fft_time(round)=toc;
```

**Perform the explicit seed dispersal**

---

```

% initialise the area
newseeds_exp_e=zeros(size_area);

% start taking time
tic

% loop through the whole seed array to select a seed donor
for coll=1:(size_area)
    for row1=1:(size_area)

        % now only loop through those parts of the seed array
        which could
        % potentially be reached (depending on the size of the
        kernel) as a
        % seed receiver
        for pos_col=max(ceil(size(kernelorg,2)/2)-
(coll1)+1,1):min(ceil(size(kernelorg,2)/2)-
(coll1)+(size_area),size(kernelorg,2)) % this is in the kernel

            for pos_row=max(ceil(size(kernelorg,2)/2)-
(row1)+1,1):min(ceil(size(kernelorg,2)/2)-
(row1)+(size_area),size(kernelorg,2)) % this is in the kernel

                %disperse the seeds

newseeds_exp_e(row1,coll)=newseeds_exp_e(row1,coll)+...
seed_prod(pos_row-
ceil(size(kernelorg,2)/2)+row1,pos_col-
ceil(size(kernelorg,2)/2)+coll)*kernelorg(pos_row,pos_col);

            end
        end
    end
end

% stop taking time for the explicit method
exp_time(round)=toc;

```

### Perform the SMSM

```

%seeds= seed matrix
% p=matrix of probabilities
% n=number of iterations

%now increase size to get rid of edge effects +edge in both
directions

temp_seed_end=seed_prod_with_border;

terrain=ones(size(temp_seed_end)); % no specific terrain defined,
but to keep this in for the time estimation

disprate=ones(size(temp_seed_end))*0.08;

```

---

```

x_max=size(temp_seed_end,1);
y_max=size(temp_seed_end,2);

seed_end=temp_seed_end;
tic
for step=1:10 % 10 steps for the SMSM

    temp_seed_end=zeros(size(seed_end));

    %neighbours

temp_seed_end(3:x_max,2:y_max-1)=temp_seed_end(3:x_max,2:y_max-1)+...

disprate(3:x_max,2:y_max-1).*seed_end(2:x_max-1,2:y_max-1)...
.*terrain(3:x_max,2:y_max-1);

temp_seed_end(1:x_max-2,2:y_max-1)=temp_seed_end(1:x_max-2,2:y_max-1)+...

disprate(1:x_max-2,2:y_max-1).*seed_end(2:x_max-1,2:y_max-1)...
.*terrain(1:x_max-2,2:y_max-1);

temp_seed_end(2:x_max-1,3:y_max)=temp_seed_end(2:x_max-1,3:y_max)+...

disprate(2:x_max-1,3:y_max).*seed_end(2:x_max-1,2:y_max-1)...
.*terrain(2:x_max-1,3:y_max);

temp_seed_end(2:x_max-1,1:y_max-2)=temp_seed_end(2:x_max-1,1:y_max-2)+...

disprate(1:x_max-2,2:y_max-1).*seed_end(2:x_max-1,2:y_max-1)...
.*terrain(2:x_max-1,1:y_max-2);

    % diagonalen

temp_seed_end(3:x_max,3:y_max)=temp_seed_end(3:x_max,3:y_max)+...

disprate(3:x_max,3:y_max).*seed_end(2:x_max-1,2:y_max-1)...
./sqrt(2).*terrain(3:x_max,3:y_max);

temp_seed_end(1:x_max-2,1:y_max-2)=temp_seed_end(1:x_max-2,1:y_max-2)+...

disprate(1:x_max-2,1:y_max-2).*seed_end(2:x_max-1,2:y_max-1)...
./sqrt(2).*terrain(1:x_max-2,1:y_max-2);

temp_seed_end(1:x_max-2,3:y_max)=temp_seed_end(1:x_max-2,3:y_max)+...

disprate(1:x_max-2,3:y_max).*seed_end(2:x_max-1,2:y_max-1)...
./sqrt(2).*terrain(1:x_max-2,3:y_max);

temp_seed_end(3:x_max,1:y_max-2)=temp_seed_end(3:x_max,1:y_max-2)...

+disprate(3:x_max,2:y_max-1).*seed_end(2:x_max-1,2:y_max-1)...
./sqrt(2).*terrain(3:x_max,1:y_max-2);

```

---

---

```

        %central

temp_seed_end(2:x_max-1,2:y_max-1)=temp_seed_end(2:x_max-1,2:y_max-1)...
        +seed_end(2:x_max-1,2:y_max-1)-...

disprate(3:x_max,2:y_max-1).*seed_end(2:x_max-1,2:y_max-1)-...

disprate(1:x_max-2,2:y_max-1).*seed_end(2:x_max-1,2:y_max-1)-...

disprate(2:x_max-1,3:y_max).*seed_end(2:x_max-1,2:y_max-1)-...

disprate(1:x_max-2,2:y_max-1).*seed_end(2:x_max-1,2:y_max-1)-...

disprate(1:x_max-2,1:y_max-2).*seed_end(2:x_max-1,2:y_max-1)/
sqrt(2)-...
        disprate(3:x_max,3:y_max).*seed_end(2:x_max-1,2:y_max-1)/
sqrt(2)-...

disprate(1:x_max-2,3:y_max).*seed_end(2:x_max-1,2:y_max-1)/
sqrt(2)-...

disprate(3:x_max,2:y_max-1).*seed_end(2:x_max-1,2:y_max-1)/sqrt(2)
;

        seed_end=temp_seed_end;

end
sms_time(round)=toc;

%go back to original size

newseeds_smsm=seed_end((size_area+1):(size_area+size_area),
(size_area+1):(size_area+size_area));

%remember the area size for this round
area_size_disp(round)=size_area^2;

end

% plot the last rounds seed matrix, and the seeds after dispersal for
both
% methods as a check
% The plots show the original seed distribution which is random and
the
% dispersed seed distribution which shows that the kernel is elongated
in
% NW to SE direction and that the borders have lower amounts of seeds
since
% they have a lower area from which they receive seeds.

figure ;imagesc(seed_prod)
title ('Seed distribution before seed dispersal')

```

---

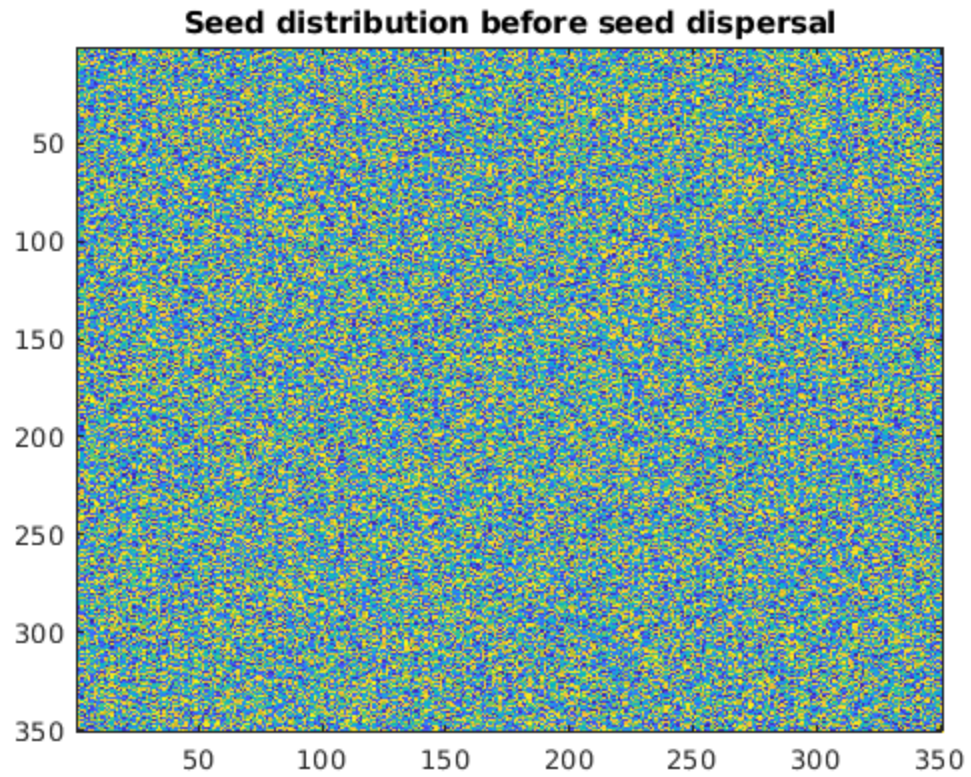

S 2.2 Seed distribution before seed dispersal

```
figure;imagesc(newseeds_fft)
title ('Seed distribution after seed dispersal with fft method')
```

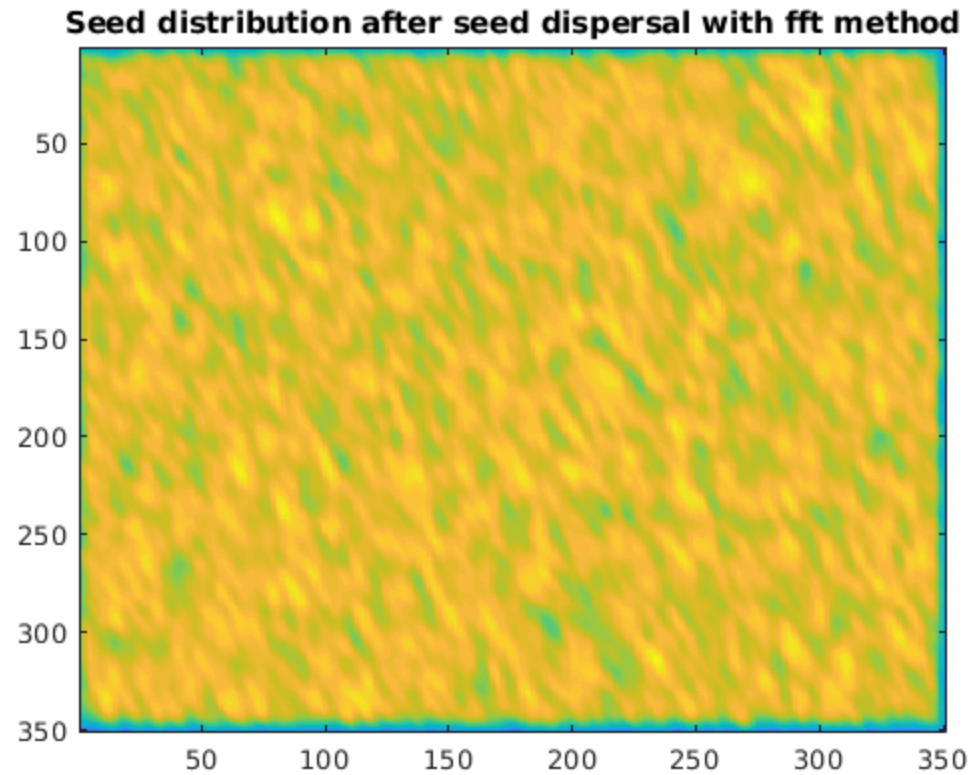

S 2.3 Seed distribution after seed dispersal with fft method

```
figure;imagesc(newseeds_exp_e)
title ('Seed distribution after seed dispersal with explicit method')
```

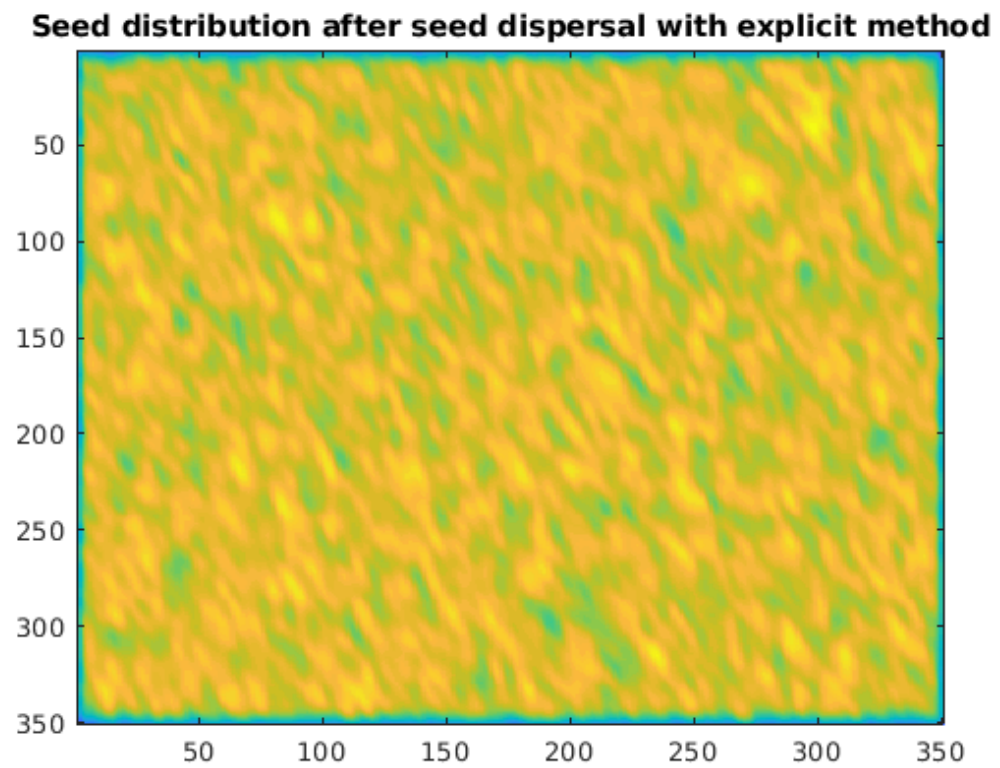

S 2.4 Seed distribution after seed dispersal with explicit method

```
figure; imagesc(newseeds_smsm)
title ('Seed distribution after seed dispersal with SMSM method')
```



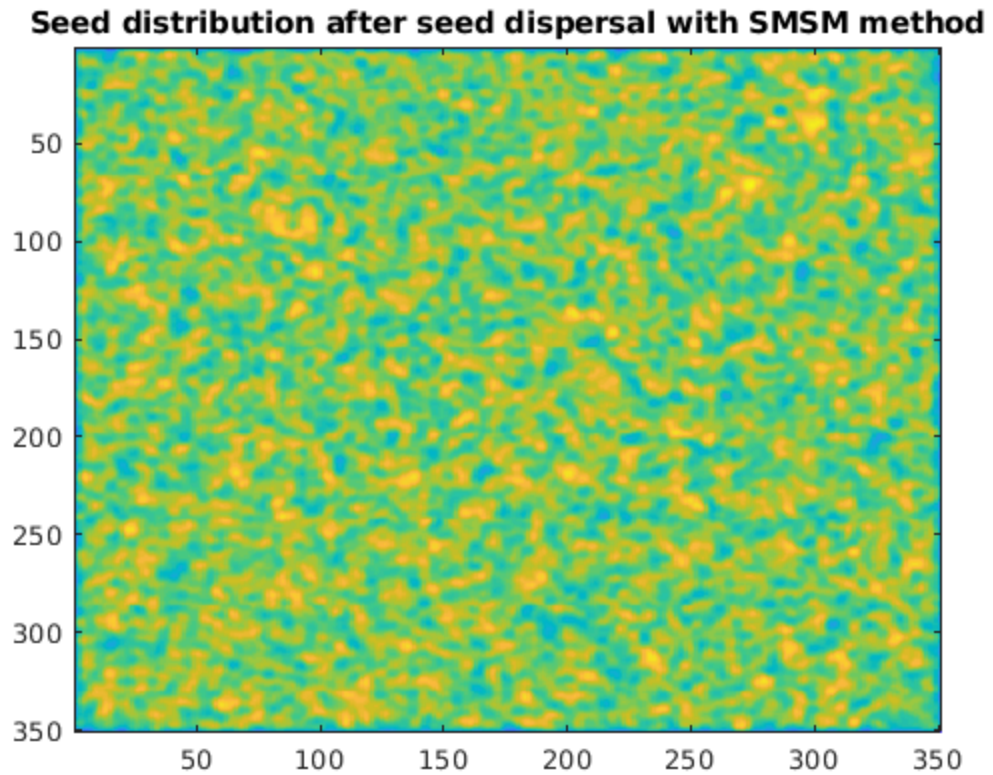

#### S 2.5 Seed distribution after seed dispersal with SMSM method

```
% plot the runtime
figure;
plot(area_size_disp,fft_time,'ok',area_size_disp,exp_time,'or',...
      area_size_disp,sms_time,'xb')
% set y axis to log for better visibility
set(gca, 'YScale', 'log')

% label
legend('fft based','explicit','seed matrix
       shift','location','northwest')
title('Runtime seed dispersal calculation')
ylabel('runtime in s')
xlabel('area size in pixel')
```

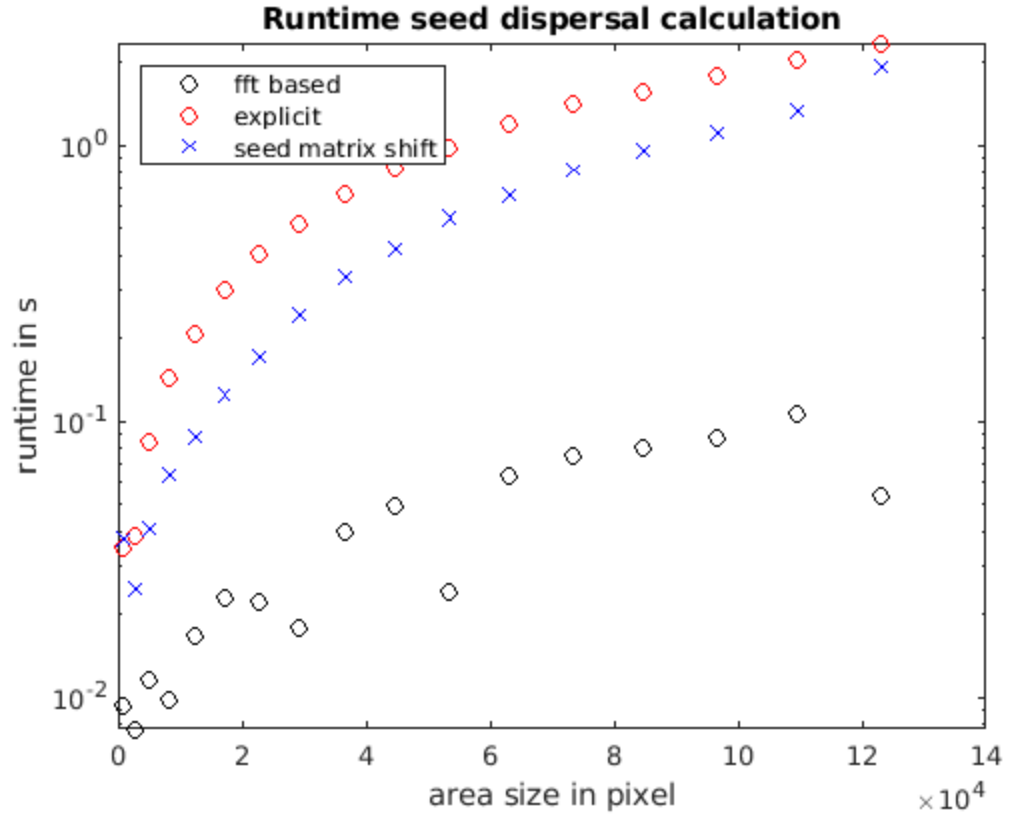

S 2.6 Run time of seed dispersal calculation. Note that though there are very pronounced differences between the different methods (FTM, SMSM), as shown in table 1 these differences are not shown in the C++ implementation within LPJ-GUESS.

*Published with MATLAB® R2018b*
