# Supplementary material for: LPJ-GM 1.0: simulating migration efficiently in a dynamic vegetation model
Source: Copernicus journal article supplement (doi:10.5194/gmd-12-893-2019), 2019-03-08
Supplement: Supplementary file 4 [file Supp_4_species_specific_parameters.pdf › Supp_4_species_specific_parameters.pdf]

**Supplementary material 4 for Lehsten et al. Simulating migration efficiently in the dynamic vegetation model using LPJ-GM 1.0**

---

Table 3.1 Species specific parameters: All parameters are either taken from Lischke *et al.*, (2006) or Hickler *et al.*, (2012) see also Smith *et al.*, (2001) for further explanation of parameters with respect to LPJ-GUESS.

| Parameter                                 | <i>Fagus sylvatica</i> | <i>Betula pendula</i> | Unit     |
|-------------------------------------------|------------------------|-----------------------|----------|
| Min. temp. for survival                   | -14                    | -30                   | Degree C |
| Shade tolerance                           | Tolerant               | Intolerant            |          |
| Leaf phenology                            | Summergreen            | Summergreen           |          |
| Min. temp. for reproduction               | -13                    | -30                   | Degree C |
| Max temp for reproduction                 | 6                      | 7                     | Degree C |
| Continentalty parameter                   | 5                      | -                     | Degree C |
| Minimum GDD5 for reproduction             | 1100                   | 350                   |          |
| Max lifespan                              | 400                    | 300                   | Years    |
| LAI scaler for seed production            | 5                      | 2                     |          |
| Min. height for seed production           | 14.4                   | 4.5                   | m        |
| Germination rate                          | 0.3                    | 0.19                  |          |
| Max seed age                              | 3.3                    | 4.8                   | years    |
| Fractions of seeds within short term disp | 0.99                   | 1                     |          |
| Short term dispersal parameter            | 25                     | 200                   | m        |
| Long term dispersal parameter             | 200                    | 0                     | m        |

Hickler, T., Vohland, K., Feehan, J., Miller, P. A., Smith, B., Costa, L., Giesecke, T., Fronzek, S., Carter, T. R., Cramer, W., Kühn, I. and Sykes, M. T.: Projecting the future distribution of European potential natural vegetation zones with a generalized, tree species-based dynamic vegetation model, Glob. Ecol. Biogeogr., 21, 50–63, doi:10.1111/j.1466-8238.2010.00613.x, 2012.

Lischke, H., Zimmermann, N. E., Bolliger, J., Rickebusch, S. and Löffler, T. J.: TreeMig: A forest-

landscape model for simulating spatio-temporal patterns from stand to landscape scale, *Ecol. Modell.*, 199(4), 409–420, doi:10.1016/j.ecolmodel.2005.11.046, 2006.

Smith, B., Prentice, I. C. and Sykes, M. T.: Representation of vegetation dynamics in the modelling of terrestrial ecosystems: comparing two contrasting approaches within European climate space, *Glob. Ecol. Biogeogr.*, 10(6), 621–637, 2001.
