# Supplementary material for: LPJ-GM 1.0: simulating migration efficiently in a dynamic vegetation model
Source: Copernicus journal article supplement (doi:10.5194/gmd-12-893-2019), 2019-03-08
Supplement: Supplementary file [file gmd-12-893-2019-supplement-title-page.pdf › gmd-12-893-2019-supplement-title-page.pdf]

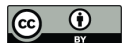

## *Supplement of*

# **LPJ-GM 1.0: simulating migration efficiently in a dynamic vegetation model**

**Veiko Lehsten et al.**

*Correspondence to:* Veiko Lehsten ([veiko.lehsten@gmail.com](mailto:veiko.lehsten@gmail.com))

- [gmd-12-893-2019-supplement-title-page.pdf](#)
- [Seed\\_dispersal\\_runtime\\_test.m](#)
- [Supp\\_1.pdf](#)
- [Supp\\_2\\_Seed\\_dispersal\\_runtime\\_test.pdf](#)
- [Supp\\_3\\_SMSM\\_example.pdf](#)
- [Supp\\_4\\_species\\_specific\\_parameters.pdf](#)

The copyright of individual parts of the supplement might differ from the CC BY 4.0 License.
